# Supplementary material for: International Multidisciplinary Consensus on the Definition and Clinical Approach for Monogenic Inflammatory Immune Dysregulation Disorders
Source: Research Square preprint supplement (doi:10.21203/rs.3.rs-5942561/v1), 2025-02-06
Supplement: Supplementary file 1 [file ed03901bc0944f4c793da49e.docx]

**Supplement**

Figure I: Schematic representation of the consensus process

Preparation

Systematic literature review

Pre-Delphi exercise

Delphi (Round I)

Delphi (Round II)

**Search Strategy**

**Search strategy for Cochrane:**

| Search Number | Search strategy | Results | Systematic Reviews Only |
| --- | --- | --- | --- |
| #1 | (monogen* OR (single NEXT gene) OR (single NEXT locus) OR Mendelian* OR hereditar* OR familial*) | 9855 | 416 |
| #2 | (inflammat* OR inflammation* OR (auto NEXT inflammat*)) | 123237 | 3390 |
| #3 | ((immune NEXT dysregulat*) OR immunodysregulat* OR (immune NEXT dysfunction) OR immunodysfunct* OR (immune NEXT regulation NEXT disorder*) OR (immune NEXT deregulat*) OR (immune NEXT regulat*)) | 1054 | 47 |
| #4 | #1 AND #2 AND #3 | 7 | 2 |

**Search strategy for Web of Science:**

| Search Number | Search strategy | Results |
| --- | --- | --- |
| #1 | TS= (monogen* OR "single gene" OR "single-locus" OR mendelian* OR hereditar* OR familial*) | 353743 |
| #2 | TS= (inflammat* OR inflammation* OR autoinflammat* OR "auto-inflammat*") | 1617141 |
| #3 | TS= ("immune dysregulat*" OR immunodysregulat* OR "immune dysfunction" OR immunodysfunct* OR "immune regulation disorder*" OR "immune deregulat*" OR "immune-regulat*") | 35308 |
| #4 | #1 AND #2 AND #3 | 410 |

**Search strategy for Scopus:**

| Search Number | Search strategy | Results |
| --- | --- | --- |
| #1 | TITLE-ABS-KEY ((monogen* OR "single-gene" OR "single-locus" OR mendelian* OR monofactorial* OR hereditar* OR familial*)) | 418714 |
| #2 | TITLE-ABS-KEY ((inflamed* OR inflammation* OR "auto-inflammat*" OR autoinflammat*)) | 1900816 |
| #3 | TITLE-ABS-KEY (("immune dysregulat*" OR immunodysregulat* OR "immune dysfunction" OR immunodysfunct* OR "immune regulation disorder*" OR "immune deregulat*" OR "immune-regulat*")) | 41785 |
| #4 | #1 AND #2 AND #3 | 508 |

**Search strategy for MEDLINE through PubMed:**

| Search Number | Search strategy | Results |
| --- | --- | --- |
| #1 | "monogen*"[All Fields] OR "single-gene"[All Fields] OR "single-locus"[All Fields] OR "mendelian*"[All Fields] OR "monofactorial*"[All Fields] OR "hereditar*"[All Fields] OR "familial*"[All Fields] | 314671 |
| #2 | "inflammat*"[All Fields] OR "inflammation*"[All Fields] OR "auto inflammat*"[All Fields] OR "autoinflammat*"[All Fields] | 1517415 |
| #3 | "immune dysregulat*"[All Fields] OR "immunodysregulat*"[All Fields] OR "immune dysfunction"[All Fields] OR "immunodysfunct*"[All Fields] OR "immune regulation disorder*"[All Fields] OR "immune deregulat*"[All Fields] OR "immune regulat*"[All Fields] | 35220 |
| #4 | #1 AND #2 AND #3 | 327 |

**PRISMA flow diagram**

Records identified from:

Cochrane Library (n=2)

Web of Science (n=410)

Scopus (n=508)

MEDLINE (n=327)

Total (n=1247)

Records removed *before screening*:

Automated duplicate records removed (n=396)

**IDENTIFICATION**

Records screened (n=851)

Manual duplicate records removed (n=165)

Records screened through title and abstract (n=686)

Abstract unavailable (n=2)

Non-English records excluded (n=22)

Non-relevant records removed (n=636)

**SCREENING**

Full text unavailable (n=3)

Non-relevant records removed (n=11)

Records assessed for eligibility (n=26)

Records included (n=12)

**INCLUDED**

**Table S1. Demographic Characteristics of Pre-Delphi process Participants**

| **Characteristics** | **Number (%)** |
| --- | --- |
| Gender  Female  Male | 59 (62.11)  36 (37.89) |
| Continent (number of countries*)  Africa (5)  Asia (12)  Europe (4)  North America (3)  South America (5) | 6 (6.31)  44 (46.31)  7 (7.36)  11 (3.15)  27 (28.42) |
| Clinical specialty  Adult immunology  Adult rheumatology  Pediatric immunology  Pediatric rheumatology | 17 (17.89)  14 (14.74)  30 (31.58)  54 (56.84) |
| Duration of clinical practice (in years)  ≤10  10 to ≤20  ≥20 | 47(49.47)  23(24.21)  25(26.31) |
| Clinical practice setting  Private: solo, group, or hospital practice  Hospital affiliated with an academic institution  Hospital affiliated with a specific sector  Governmental hospital  Others | 28(29.47)  54(56.84)  8(8.42)  31(32.63)  3(3.16) |
| *Countries include Algeria, Argentina, Austria, Bahrain, Brazil, Canada, China, Colombia, Dominican Republic, Ecuador, Egypt, Iran, Iraq, Ireland, Italy, Jordan, Kuwait, Libya, Oman, Palestinian Territory, Panama, Qatar, Saudi Arabia, Singapore, Sudan, Tunisia, United Arab Emirates, United Kingdom, United States of America. | |

**Table S2. Results from the First Round of Voting**

|  | | **Agreement** | | **Descriptive Statistics** | |
| --- | --- | --- | --- | --- | --- |
| **Percentage (%)** | **Mean** | **Standard deviation** | **Interquartile range** |
| **Overarching Principles** | | | | | |
| A.1 | Monogenic Inflammatory Immune-Dysregulation Disorders (MIIDDs) is an umbrella term for a heterogeneous group of disorders. | 93.33 | 4.4 | 1.06 | 1.0 |
| A.2 | A patient with Monogenic Inflammatory Immune-Dysregulation Disorder (MIIDD) is defined as having a pathogenic gene mutation, immune system dysregulation, and inflammatory manifestations. | 93.33 | 4.13 | 0.99 | 1.0 |
| B.3 | The availability of and accessibility to genetic testing will improve patient recognition and ultimate care. | 93.33 | 4.6 | 1.06 | 0.0 |
| B.4 | There is a need for the development of a definition of disease remission in patients with MIIDDs. | 93.33 | 4.4 | 0.83 | 1.0 |
| B.5 | There is a need for the development and validation of disease activity and damage indices for patients with MIIDDs. | 100 | 4.53 | 0.52 | 1.0 |
| C.6 | Clinical improvement while on treatment is a feasible goal in the management of patients with MIIDDs. | 93.33 | 4.2 | 0.56 | 0.5 |
| C.7 | More effective therapeutic options for the management of patients with MIIDDs should be explored and tested. | 100 | 4.6 | 0.51 | 1.0 |
| C.8 | There is a need for the development of therapeutic guidelines for the management of patients with MIIDDs. | 93.33 | 4.53 | 1.06 | 0.5 |
| **Recommendations** | | | | | |
| B.1 | Clinical and laboratory improvement should be used to assess the response to treatment. | 100 | 4.47 | 0.52 | 1.0 |
| C.2 | Corticosteroids are the mainstay of treatment for patients with MIIDDs. | 40 | 3.07 | 1.10 | 2.0 |
| C.3 | Both conventional and/or biologic disease-modifying antirheumatic drugs can be used in patients with MIIDDs. | 86.67 | 3.73 | 0.96 | 0.0 |
| C.4 | A step-up approach is preferred when managing patients with MIIDDs. | 86.67 | 3.73 | 0.80 | 0.0 |
| C.5 | Intravenous immunoglobulin (IVIG) should be considered in the treatment of selected patients with MIIDDs. | 80 | 3.87 | 0.74 | 0.0 |
| C.6 | Antibiotic prophylaxis should be considered for the management of selected patients with MIIDDs. | 66.67 | 3.73 | 0.59 | 1.0 |
| C.7 | A hematopoietic stem cell transplant is a therapeutic option for the management of selected patients with MIIDDs. | 86.67 | 3.93 | 0.70 | 0.0 |
| D.8 | The primary healthcare provider can be the rheumatologist or the immunologist, based on the predominant clinic picture in patients with MIIDDs. However, a joint rheumatology/immunology care or clinic is advocated to provide optimum care for patients with MIIDDs. | 93.33 | 4.53 | 1.06 | 0.5 |
| D.9 | Collaboration with other subspecialties as needed is advocated in the care of patients with MIIDDs. | 93.33 | 4.47 | 1.06 | 1.0 |
| D.10 | Patients with MIIDDs should be followed up at least every 12 weeks. | 73.3 | 3.8 | 1.08 | 1.0 |
| D.11 | Patients with MIIDDs should be screened for other non-inflammatory autoimmune conditions, such as autoimmune thyroiditis. | 100 | 4.53 | 0.52 | 1.0 |
| E.12 | Patients with MIIDDs should be educated regarding their disease and provided with ongoing support. | 100 | 4.8 | 0.41 | 0.0 |

*The recommendations highlighted in yellow did not meet the consensus threshold, which was established at ≥80%.

**Table S3. Modifications after the First Round of Voting**

|  | **Overarching Principles** | **Modifications** |
| --- | --- | --- |
| A.1 | Monogenic Inflammatory Immune-Dysregulation Disorders (MIIDDs) is an umbrella term for a heterogeneous group of disorders. | None |
| A.2 | A patient with Monogenic Inflammatory Immune-Dysregulation Disorder (MIIDD) is defined as having a pathogenic gene mutation, immune system dysregulation, and inflammatory manifestations. | Rephrased to: A patient with Monogenic Inflammatory Immune-Dysregulation Disorder (MIIDD) is defined as having a pathogenic gene mutation, immune system dysregulation, and inflammatory manifestations with clinical features that can evolve over time. |
| B.3 | The availability of and accessibility to genetic testing will improve patient recognition and ultimate care. | Rephrased to: The availability, accessibility, and accurate interpretation of genetic testing will enhance patient identification and improve overall care outcomes. |
| B.4 | There is a need for the development of a definition of disease remission in patients with MIIDDs. | None |
| B.5 | There is a need for the development and validation of disease activity and damage indices for patients with MIIDDs. | None |
| C.6 | Clinical improvement while on treatment is a feasible goal in the management of patients with MIIDDs. | None |
| C.7 | More effective therapeutic options for the management of patients with MIIDDs should be explored and tested. | None |
| C.8 | There is a need for the development of therapeutic guidelines for the management of patients with MIIDDs. | None |
|  | **Recommendations** | **Modifications** |
| B.1 | Clinical and laboratory improvement should be used to assess the response to treatment. | None |
| C.2 | Corticosteroids are the mainstay of treatment for patients with MIIDDs. | Rephrased to: Corticosteroids may serve as a therapeutic option for some patients with MIIDDs, depending on the clinical context and individual patient needs. |
| C.3 | Both conventional and/or biologic disease-modifying antirheumatic drugs can be used in patients with MIIDDs. | Rephrased to: Both conventional and/or biologic disease-modifying antirheumatic drugs may serve as therapeutic options for some patients with MIIDDs, depending on the clinical context and individual patient needs. |
| C.4 | A step-up approach is preferred when managing patients with MIIDDs. | Omitted |
| C.5 | Intravenous immunoglobulin (IVIG) should be considered in the treatment of selected patients with MIIDDs. | Rephrased to: Intravenous immunoglobulin (IVIG) may serve as a therapeutic option for some patients with MIIDDs, depending on the clinical context and individual patient needs. |
| C.6 | Antibiotic prophylaxis should be considered for the management of selected patients with MIIDDs. | Rephrased to: Antibiotic prophylaxis may be required for some patients with MIIDDs, depending on the clinical context and individual patient needs. |
| C.7 | A hematopoietic stem cell transplant is a therapeutic option for the management of selected patients with MIIDDs. | Rephrased to: A hematopoietic stem cell transplant may be needed for some patients with MIIDDs, depending on the clinical context and individual patient needs. |
| D.8 | The primary healthcare provider can be the rheumatologist or the immunologist, based on the predominant clinic picture in patients with MIIDDs. However, a joint rheumatology/immunology care or clinic is advocated to provide optimum care for patients with MIIDDs. | Rephrased to: Based on the predominant clinic picture in patients with MIIDDs, the primary healthcare provider can be a rheumatologist or an immunologist. However, joint rheumatology/immunology care or clinics are advocated to provide optimum care for patients with MIIDDs. |
| D.9 | Collaboration with other subspecialties as needed is advocated in the care of patients with MIIDDs. | None |
| D.10 | Patients with MIIDDs should be followed up at least every 12 weeks. | Omitted |
| D.11 | Patients with MIIDDs should be screened for other non-inflammatory autoimmune conditions, such as autoimmune thyroiditis. | None |
| E.12 | Patients with MIIDDs should be educated regarding their disease and provided with ongoing support. | None |

*In response to feedback from Round 1:

- Overarching Principles numbered 2 and 3, as well as the Recommendations numbered 1, 4, 6, and 9, have been revised to improve clarity (green)
- Recommendations numbers 3 and 7 received a percentage agreement of 40% and 66.67%, respectively, which are below the established threshold of 80%. However, these recommendations were rephrased to improve clarity and were subjected to further evaluation in Round 2 (blue)
- Recommendation number 12 was omitted due to a low percentage agreement, recorded at 73.3%. This was particularly justified given that the evidence supporting this recommendation was considered weak (orange)
- Recommendation number 5 was omitted (despite receiving a high level of percentage agreement at 86.67%) due to concerns regarding its clarity (grey)
